# Supplementary material for: ACE and UCP2 gene polymorphisms and their association with baseline and exercise-related changes in the functional performance of older adults
Source: PeerJ. 2015 May 28;3:e980. doi: 10.7717/peerj.980 (PMC4451023; doi:10.7717/peerj.980)
Supplement: Supplemental Information 1 [file peerj-03-980-s001.xlsx]

## Sheet: Sheet1
SubjectNo	Gender	R.A.code	Height	BMass_Pre	BMass_Post	Age	Grip_Pre	Grip_Post	Grip_diff	MuscEnd_Pre	MuscEnd_Post	MuscEnd_diff	UpandGo_Pre	UpandGo_Post	UandG_diff	ChairStand_Pre	ChairStand_Post	ChairSt_diff	@6minWalk_Yds_Pre	@6minWalk_Yds_Post	@6minWalk_Metre_Pre	@6minWalk_Metre_Post	@6minwalk_diff	HandEye_Left_Pre	HandEye_Left_Post	HandEye_Right_Pre	HandEye_Right_Post	HandEye_Both_Pre	HandEye_Both_Post	HandEye_Assem_Pre	HandEye_Assem_Post	ACE_coded	UCP2_coded	AMPD1_coded	ACE	UCP2	AMPD1	hgt_m	BMIpre	BMIpost	BMIdiff	ACEIIIDvDD	ACEIIvIDDD
1	2	BD004	162	50	51	64	26	26	0	10	12	2	4.2	3.9	0.3	19	19	0	590	600	539.26	548.64	9.38	10	12	11	13	14	14	17	19	1	2	2	II	GA	CT	1.62	19.052	19.433	0.381039	1	1
2	2	BD005	164	73.3	72	73	15	17	2	18	18	0	4.7	5.9	-1.2	14	15	1	440	445	402.16	406.908	4.748	11	10	10	10	12	10	22	19	2	2	1	ID	GA	CC	1.64	27.2531	26.7698	-0.483343	1	2
3	2	BD011	164	91	91	68	34	37	3	19	22	3	4.5	4.4	0.1	14	16	2	600	620	548.4	566.928	18.528	11	13	13	15	18	18	23	25	2	1	2	ID	GG	CT	1.64	33.834	33.834	0	1	2
4	2	BD012	155	51.2	51	71	28	26	-2	20	19	-1	3.88	3.7	0.18	15	16	1	695	720	635.23	658.368	23.138	14	14	15	14	20	20	24	25	2	3	1	ID	AA	CC	1.55	21.3111	21.2279	-0.083247	1	2
5	2	BD013	160.5	62	61	72	34	28	-6	21	22	1	3.06	3.06	0	21	21	0	730	740	667.22	676.656	9.436	15	15	16	16	22	24	24	23	2	1	1	ID	GG	CC	1.605	24.0681	23.6799	-0.388195	1	2
6	2	BD014	156	63.4	62	78	28	29	1	14	14	0	4.19	4.19	0	16	15	-1	660	650	603.24	594.36	-8.88	12	11	12	14	22	24	23	26	#NULL!	#NULL!	#NULL!				1.56	26.0519	25.4767	-0.575279	#NULL!	#NULL!
7	2	BD015	160	89	87	64	24	25	1	22	22	0	4.3	4.2	0.1	17	19	2	550	570	502.7	521.208	18.508	11	13	12	13	16	20	26	26	2	3	1	ID	AA	CC	1.6	34.7656	33.9844	-0.78125	1	2
8	2	BD016	158	61.2	61	80	23	25	2	17	18	1	3.94	3.8	0.14	16	16	0	570	590	520.98	539.496	18.516	12	16	14	14	18	18	25	25	2	2	1	ID	GA	CC	1.58	24.5153	24.4352	-0.080115	1	2
9	2	BD017	148	50.6	51	84	21	21	0	15	15	0	4.56	4.3	0.26	15	17	2	645	690	589.53	630.936	41.406	14	14	14	15	18	20	19	23	#NULL!	#NULL!	#NULL!				1.48	23.1008	23.2834	0.182615	#NULL!	#NULL!
10	2	BD029	152	59.1	58	66	27	33	6	16	16	0	5.3	4.8	0.5	13	14	1	590	635	539.26	580.644	41.384	9	12	10	13	14	16	19	22	3	3	1	DD	AA	CC	1.52	25.58	25.1039	-0.476108	2	2
11	2	BD039	151	72	72	74	23	27	4	16	16	0	4	3.8	0.2	13	16	3	640	650	584.96	594.36	9.4	10	12	9	12	14	16	19	20	3	1	1	DD	GG	CC	1.51	31.5776	31.5776	0	2	2
12	2	BD040	160	58	58	79	27	27	0	15	16	1	3.9	3.9	0	14	15	1	590	630	539.26	576.072	36.812	13	15	11	14	20	22	18	20	2	1	1	ID	GG	CC	1.6	22.6562	22.6562	0	1	2
13	2	BD041	160	43.5	43.5	61	21	23	2	14	14	0	4.2	4.2	0	15	16	1	555	600	507.27	548.64	41.37	15	15	14	15	24	22	22	24	2	3	1	ID	AA	CC	1.6	16.9922	16.9922	0	1	2
14	2	BD042	166	77	79	68	22	22	0	14	15	1	5.4	4.9	0.5	14	13	-1	560	550	511.84	502.92	-8.92	11	15	13	13	18	20	20	22	3	1	1	DD	GG	CC	1.66	27.9431	28.6689	0.725795	2	2
15	2	BD043	160	53.7	53.7	79	26	29	3	12	14	2	6.3	5.8	0.5	13	16	3	535	570	488.99	521.208	32.218	12	13	13	16	16	20	21	23	2	2	1	ID	GA	CC	1.6	20.9766	20.9766	0	1	2
16	2	BD049	165	65	63	63	34	36	2	15	16	1	4.1	3.4	0.7	12	13	1	530	550	484.42	502.92	18.5	11	14	12	14	22	24	24	25	2	1	1	ID	GG	CC	1.65	23.8751	23.1405	-0.734619	1	2
17	2	BD050	165	75	75	72	22	20	-2	15	16	1	4.3	4.1	0.2	12	14	2	550	555	502.7	507.492	4.792	11	14	12	14	20	18	21	23	2	1	2	ID	GG	CT	1.65	27.5482	27.5482	0	1	2
18	2	BD051	166	75	75	68	16	21	5	14	16	2	3.8	3.7	0.1	14	15	1	540	560	493.56	512.064	18.504	13	16	13	17	22	24	24	22	3	2	2	DD	GA	CT	1.66	27.2173	27.2173	0	2	2
19	2	BD052	165	79	78	74	24	20	-4	11	14	3	5.3	5.6	-0.3	12	15	3	505	575	461.57	525.78	64.21	11	9	12	11	18	20	19	17	2	1	1	ID	GG	CC	1.65	29.0174	28.6501	-0.367309	1	2
20	2	BD053	161	72	72	70	24	26	2	13	13	0	4	3.9	0.1	11	12	1	530	575	484.42	525.78	41.36	12	15	13	15	24	24	28	29	3	2	2	DD	GA	CT	1.61	27.7767	27.7767	0	2	2
21	2	BD054	166	66	66	75	29	22	-7	15	18	3	4.8	5.6	-0.8	11	12	1	545	605	498.13	553.212	55.082	8	5	10	14	14	12	14	11	2	2	1	ID	GA	CC	1.66	23.9512	23.9512	0	1	2
22	2	BD057	166	60	58	67	32	34	2	19	20	1	4.3	4.9	-0.6	12	22	10	585	700	534.69	640.08	105.39	10	11	14	14	18	22	21	26	3	2	1	DD	GA	CC	1.66	21.7738	21.048	-0.725795	2	2
23	2	BD059	162	60	60	66	20	20	0	16	19	3	3.6	5.1	-1.5	14	21	7	560	630	511.84	576.072	64.232	14	14	12	15	26	26	24	24	2	2	1	ID	GA	CC	1.62	22.8624	22.8624	0	1	2
24	2	BD060	169	57	56	63	28	32	4	17	17	0	3.6	3.5	0.1	16	17	1	615	630	562.11	576.072	13.962	18	18	12	13	20	22	29	28	#NULL!	#NULL!	#NULL!				1.69	19.9573	19.6072	-0.350128	#NULL!	#NULL!
25	2	AJ001	158.5	59.3	#NULL!	61	15.75	15.75	0	16	13	-3	5.7	4.6	1.1	11	15	4	600	660	548.64	603.504	54.864	12	10	11	12	11	11	21	18	2	2	1	ID	GA	CC	1.585	23.6046	#NULL!	#NULL!	1	2
26	2	AJ003	165	67.3	#NULL!	58	27	22.5	-4.5	17	20	3	5.6	4.3	1.3	14	16	2	#NULL!	#NULL!	#NULL!	#NULL!	#NULL!	13	14	14	13	10	9	36	27	#NULL!	#NULL!	#NULL!				1.65	24.7199	#NULL!	#NULL!	#NULL!	#NULL!
27	2	AJ006	167	104.6	#NULL!	63	18	27	9	20	20	0	6.5	4.56	1.94	12	15	3	560	610	512.064	557.784	45.72	14	12	12	13	11	11	27	20	2	1	1	ID	GG	CC	1.67	37.5058	#NULL!	#NULL!	1	2
28	2	AJ010	163	65.1	#NULL!	#NULL!	26.1	24.75	-1.35	14	20	6	3.73	4.2	-0.47	15	15	0	590	650	539.496	594.36	54.864	10	15	15	12	10	10	23	20	2	3	1	ID	AA	CC	1.63	24.5022	#NULL!	#NULL!	1	2
29	2	AJ009	164.5	64.1	#NULL!	63	27	24.75	-2.25	21	24	3	3.94	3.8	0.14	16	20	4	625	695	571.5	635.508	64.008	14	12	13	14	10	12	24	30	2	1	2	ID	GG	CT	1.645	23.6879	#NULL!	#NULL!	1	2
30	2	AJ017	170	88.3	88	69	22.5	24.75	2.25	13	15	2	5.2	4.6	0.6	10	19	9	590	620	539.496	566.928	27.432	11	13	13	13	9	9	20	24	1	2	1	II	GA	CC	1.7	30.5536	30.4498	-0.103806	1	1
31	2	AJ022	168.5	79.5	79.5	71	15.75	20.25	4.5	10	10	0	6.3	6.3	0	10	10	0	560	560	512.064	512.064	0	11	12	12	13	10	8	20	25	1	2	2	II	GA	CT	1.685	28.0006	28.0006	0	1	1
32	2	AJ025	156	57.7	#NULL!	69	24.75	#NULL!	#NULL!	18	#NULL!	#NULL!	5	#NULL!	#NULL!	17	#NULL!	#NULL!	580	#NULL!	530.352	#NULL!	#NULL!	13	#NULL!	11	#NULL!	9	#NULL!	23	#NULL!	1	1	1	II	GG	CC	1.56	23.7097	#NULL!	#NULL!	1	1
33	2	AJ027	153	64.1	63.5	81	20.25	18	-2.25	13	14	1	6	6.3	-0.3	13	17	4	480	515	438.912	470.916	32.004	14	14	12	14	10	10	16	26	2	1	2	ID	GG	CT	1.53	27.3826	27.1263	-0.256312	1	2
34	2	AJ029	174	90.3	89.8	73	22.5	24.75	2.25	12	13	1	4.6	4.5	0.1	11	12	1	540	590	493.776	539.496	45.72	11	14	11	13	11	11	21	23	3	2	1	DD	GA	CC	1.74	29.8256	29.6605	-0.165147	2	2
35	1	AJ030	174	102	100.2	62	41.4	49.5	8.1	15	20	5	4.1	3.4	0.7	11	18	7	535	655	489.204	598.932	109.728	14	15	12	14	12	13	31	35	2	2	1	ID	GA	CC	1.74	33.6901	33.0955	-0.59453	1	2
36	2	AJ035	155	#NULL!	48.8	68	22.5	20.25	-2.25	#NULL!	#NULL!	#NULL!	#NULL!	#NULL!	#NULL!	#NULL!	#NULL!	#NULL!	#NULL!	#NULL!	#NULL!	#NULL!	#NULL!	12	13	15	14	10	10	16	24	2	1	1	ID	GG	CC	1.55	#NULL!	20.3122	#NULL!	1	2
37	2	AJ036	158	75.2	76	73	18	22.5	4.5	13	26	13	4.5	4.1	0.4	31	26	-5	605	650	553.212	594.36	41.148	13	13	14	15	10	12	28	26	3	1	1	DD	GG	CC	1.58	30.1234	30.4438	0.320461	2	2
38	2	AJ038	#NULL!	#NULL!	68.6	71	21.6	11.25	-10.35	#NULL!	22	#NULL!	#NULL!	4.9	#NULL!	#NULL!	16	#NULL!	#NULL!	490	#NULL!	448.056	#NULL!	11	14	13	12	9	11	21	22	2	2	1	ID	GA	CC	#NULL!	#NULL!	#NULL!	#NULL!	1	2
39	2	AJ043	#NULL!	#NULL!	66	66	38.25	36	-2.25	#NULL!	27	#NULL!	#NULL!	3.9	#NULL!	#NULL!	18	#NULL!	#NULL!	665	#NULL!	608.076	#NULL!	11	12	12	13	11	9	22	28	1	2	1	II	GA	CC	#NULL!	#NULL!	#NULL!	#NULL!	1	1
40	2	AJ044	159	81.4	80.6	#NULL!	37.35	36	-1.35	20	22	2	5.5	4.3	1.2	16	18	2	575	595	525.78	544.068	18.288	11	10	12	11	9	10	16	18	1	2	1	II	GA	CC	1.59	32.1981	31.8817	-0.316443	1	1
41	2	AJ046	164	82.6	79	#NULL!	11.25	#NULL!	#NULL!	17	27	10	5.5	4.6	0.9	14	16	2	500	525	457.2	480.06	22.86	10	#NULL!	10	#NULL!	12	#NULL!	20	#NULL!	3	1	1	DD	GG	CC	1.64	30.7109	29.3724	-1.33849	2	2
42	2	AJ048	165	67.5	65.6	64	18	18	0	22	29	7	4.4	4.2	0.2	26	17	-9	765	705	699.516	644.652	-54.864	13	12	13	10	10	10	30	25	3	2	1	DD	GA	CC	1.65	24.7934	24.0955	-0.697888	2	2
43	2	AJ055	162	77.8	77.8	74	18	22.5	4.5	20	13	-7	6.9	6.5	0.4	16	13	-3	470	535	429.768	489.204	59.436	10	12	12	11	7	9	18	18	1	1	1	II	GG	CC	1.62	29.6449	29.6449	0	1	1
44	2	AJ056	164	88.2	85.8	68	#NULL!	#NULL!	#NULL!	20	14	-6	6.15	5.5	0.65	15	13	-2	475	530	434.34	484.632	50.292	#NULL!	#NULL!	#NULL!	#NULL!	#NULL!	#NULL!	#NULL!	#NULL!	#NULL!	#NULL!	#NULL!				1.64	32.793	31.9007	-0.892326	#NULL!	#NULL!
45	2	AJ059	164	101	99.6	#NULL!	18	22.5	4.5	21	23	2	5.9	5.2	0.7	17	17	0	500	495	457.2	452.628	-4.572	14	11	14	13	14	11	21	20	1	2	2	II	GA	CT	1.64	37.5521	37.0315	-0.520523	1	1
46	2	AJ061	#NULL!	#NULL!	75.4	69	18	#NULL!	#NULL!	#NULL!	#NULL!	#NULL!	#NULL!	#NULL!	#NULL!	#NULL!	#NULL!	#NULL!	#NULL!	#NULL!	#NULL!	#NULL!	#NULL!	11	12	13	14	10	10	22	22	3	2	1	DD	GA	CC	#NULL!	#NULL!	#NULL!	#NULL!	2	2
47	2	AJ063	169	70	65.6	#NULL!	20.25	22.5	2.25	23	24	1	3.8	3.8	0	22	21	-1	665	730	608.076	667.512	59.436	14	13	13	12	11	9	18	24	#NULL!	#NULL!	#NULL!				1.69	24.5089	22.9684	-1.54056	#NULL!	#NULL!
48	1	AJ064	171	91	#NULL!	#NULL!	#NULL!	#NULL!	#NULL!	22	#NULL!	#NULL!	4.4	#NULL!	#NULL!	21	#NULL!	#NULL!	555	#NULL!	507.492	#NULL!	#NULL!	#NULL!	#NULL!	#NULL!	#NULL!	#NULL!	#NULL!	#NULL!	#NULL!	3	3	1	DD	AA	CC	1.71	31.1207	#NULL!	#NULL!	2	2
49	1	BD002	173	84.7	85	68	43	44	1	20	22	2	4.3	4	0.3	20	21	1	435	460	397.59	420.624	23.034	18	17	10	12	16	18	20	23	#NULL!	#NULL!	#NULL!				1.73	28.3003	28.4005	0.100237	#NULL!	#NULL!
50	1	BD003	174	113.4	112	77	36	43	7	18	20	2	6.9	6.1	0.8	14	13	-1	400	420	365.6	384.048	18.448	8	9	8	10	12	14	15	15	#NULL!	#NULL!	#NULL!				1.74	37.4554	36.993	-0.462412	#NULL!	#NULL!
51	1	BD032	165	68.9	68	80	34	37	3	13	14	1	4.2	4	0.2	13	15	2	645	670	589.53	612.648	23.118	14	15	15	14	20	20	23	24	#NULL!	#NULL!	#NULL!				1.65	25.3076	24.977	-0.330579	#NULL!	#NULL!
52	1	BD046	174	85.8	82	77	20	24	4	11	13	2	5.6	5.2	0.4	9	12	3	565	570	516.41	521.208	4.798	14	14	14	15	18	18	24	25	2	2	1	ID	GA	CC	1.74	28.3393	27.0842	-1.25512	1	2
53	1	BD047	174	75	77	65	46	56	10	19	20	1	3.9	3.7	0.2	18	21	3	640	675	584.96	617.22	32.26	12	15	10	14	24	16	20	28	2	1	1	ID	GG	CC	1.74	24.7721	25.4327	0.660589	1	2
54	1	BD048	174	67	67	74	42	46	4	16	20	4	3.6	3.5	0.1	12	22	10	655	735	598.67	672.084	73.414	11	10	9	10	10	14	19	9	2	2	2	ID	GA	CT	1.74	22.1297	22.1297	0	1	2
55	1	BD055	177	83	83	79	38	34	-4	14	17	3	3.6	4.5	-0.9	12	17	5	590	700	539.26	640.08	100.82	10	12	13	9	16	20	20	27	2	2	1	ID	GA	CC	1.77	26.493	26.493	0	1	2
56	1	BD056	178	84	84	69	48	49	1	12	15	3	3.8	3.6	0.2	15	17	2	570	590	520.98	539.496	18.516	11	14	13	14	14	18	28	27	2	2	1	ID	GA	CC	1.78	26.5118	26.5118	0	1	2
57	1	BD079	182	75	74	72	34	37	3	13	15	2	4.4	4.1	0.3	13	15	2	510	560	466.14	512.064	45.924	14	18	12	14	16	16	24	25	1	2	2	II	GA	CT	1.82	22.6422	22.3403	-0.301896	1	1
58	1	AJ004	163.8	61.8	#NULL!	75	20.25	29.25	9	17	17	0	6.1	3.3	2.8	15	15	0	600	675	548.64	617.22	68.58	10	11	12	12	10	10	26	22	2	1	1	ID	GG	CC	1.638	23.0335	#NULL!	#NULL!	1	2
59	1	AJ005	185	148.6	#NULL!	65	42.75	40.5	-2.25	21	21	0	10.3	8.9	1.4	8	8	0	385	390	352.044	356.616	4.572	12	13	12	8	10	9	20	22	1	1	1	II	GG	CC	1.85	43.4186	#NULL!	#NULL!	1	1
60	1	AJ011	189.4	122	#NULL!	64	56.25	52.65	-3.6	19	24	5	3.24	3.8	-0.56	16	24	8	570	595	521.208	544.068	22.86	12	10	12	9	8	9	17	19	2	3	1	ID	AA	CC	1.894	34.0095	#NULL!	#NULL!	1	2
61	1	AJ016	166	72.6	70	61	29.25	28.35	-0.9	19	19	0	4.8	4.5	0.3	12	20	8	595	600	544.068	548.64	4.572	#NULL!	15	#NULL!	13	#NULL!	10	#NULL!	23	3	2	1	DD	GA	CC	1.66	26.3463	25.4028	-0.943533	2	2
62	1	AJ019	167	74.9	74.4	69	38.25	40.5	2.25	20	22	2	4	3	1	14	22	8	605	770	553.212	704.088	150.876	10	11	12	10	8	9	20	20	3	1	1	DD	GG	CC	1.67	26.8565	26.6772	-0.179282	2	2
63	1	AJ037	181	88	87.4	78	32.85	33.75	0.9	16	18	2	5.2	4.7	0.5	15	16	1	570	650	521.208	594.36	73.152	11	11	13	11	6	10	19	20	3	2	1	DD	GA	CC	1.81	26.8612	26.6781	-0.183145	2	2
64	1	AJ039	#NULL!	#NULL!	115.5	73	35.1	33.75	-1.35	#NULL!	#NULL!	#NULL!	#NULL!	#NULL!	#NULL!	#NULL!	#NULL!	#NULL!	#NULL!	#NULL!	#NULL!	#NULL!	#NULL!	11	9	9	10	8	9	18	18	2	2	2	ID	GA	CT	#NULL!	#NULL!	#NULL!	#NULL!	1	2
65	1	AJ045	175	95.4	94.2	#NULL!	40.5	#NULL!	#NULL!	22	26	4	4.9	4.5	0.4	15	18	3	525	490	480.06	448.056	-32.004	9	#NULL!	10	#NULL!	10	#NULL!	16	#NULL!	3	3	1	DD	AA	CC	1.75	31.151	30.7592	-0.391837	2	2
66	1	AJ047	179	87.8	85.4	67	48.15	49.5	1.35	27	28	1	3.1	2.9	0.2	38	31	-7	900	950	822.96	868.68	45.72	12	11	13	15	11	10	23	22	3	2	1	DD	GA	CC	1.79	27.4024	26.6533	-0.74904	2	2
67	1	AJ062	180	84.4	82.6	#NULL!	45	49.5	4.5	16	22	6	4.4	4	0.4	15	17	2	605	660	553.212	603.504	50.292	10	11	11	12	10	8	17	20	1	1	1	II	GG	CC	1.8	26.0494	25.4938	-0.555556	1	1
#NULL!	#NULL!		#NULL!	#NULL!	#NULL!	#NULL!	#NULL!	#NULL!	#NULL!	#NULL!	#NULL!	#NULL!	#NULL!	#NULL!	#NULL!	#NULL!	#NULL!	#NULL!	#NULL!	#NULL!	#NULL!	#NULL!	#NULL!	#NULL!	#NULL!	#NULL!	#NULL!	#NULL!	#NULL!	#NULL!	#NULL!	#NULL!	#NULL!	#NULL!				#NULL!	#NULL!	#NULL!	#NULL!	#NULL!	#NULL!
#NULL!	#NULL!		#NULL!	#NULL!	#NULL!	#NULL!	#NULL!	#NULL!	#NULL!	#NULL!	#NULL!	#NULL!	#NULL!	#NULL!	#NULL!	#NULL!	#NULL!	#NULL!	#NULL!	#NULL!	#NULL!	#NULL!	#NULL!	#NULL!	#NULL!	#NULL!	#NULL!	#NULL!	#NULL!	#NULL!	#NULL!	#NULL!	#NULL!	#NULL!				#NULL!	#NULL!	#NULL!	#NULL!	#NULL!	#NULL!
#NULL!	#NULL!		#NULL!	#NULL!	#NULL!	#NULL!	#NULL!	#NULL!	#NULL!	#NULL!	#NULL!	#NULL!	#NULL!	#NULL!	#NULL!	#NULL!	#NULL!	#NULL!	#NULL!	#NULL!	#NULL!	#NULL!	#NULL!	#NULL!	#NULL!	#NULL!	#NULL!	#NULL!	#NULL!	#NULL!	#NULL!	#NULL!	#NULL!	#NULL!				#NULL!	#NULL!	#NULL!	#NULL!	#NULL!	#NULL!
#NULL!	#NULL!		#NULL!	#NULL!	#NULL!	#NULL!	#NULL!	#NULL!	#NULL!	#NULL!	#NULL!	#NULL!	#NULL!	#NULL!	#NULL!	#NULL!	#NULL!	#NULL!	#NULL!	#NULL!	#NULL!	#NULL!	#NULL!	#NULL!	#NULL!	#NULL!	#NULL!	#NULL!	#NULL!	#NULL!	#NULL!	#NULL!	#NULL!	#NULL!				#NULL!	#NULL!	#NULL!	#NULL!	#NULL!	#NULL!
#NULL!	#NULL!		#NULL!	#NULL!	#NULL!	#NULL!	#NULL!	#NULL!	#NULL!	#NULL!	#NULL!	#NULL!	#NULL!	#NULL!	#NULL!	#NULL!	#NULL!	#NULL!	#NULL!	#NULL!	#NULL!	#NULL!	#NULL!	#NULL!	#NULL!	#NULL!	#NULL!	#NULL!	#NULL!	#NULL!	#NULL!	#NULL!	#NULL!	#NULL!				#NULL!	#NULL!	#NULL!	#NULL!	#NULL!	#NULL!
#NULL!	#NULL!		#NULL!	#NULL!	#NULL!	#NULL!	#NULL!	#NULL!	#NULL!	#NULL!	#NULL!	#NULL!	#NULL!	#NULL!	#NULL!	#NULL!	#NULL!	#NULL!	#NULL!	#NULL!	#NULL!	#NULL!	#NULL!	#NULL!	#NULL!	#NULL!	#NULL!	#NULL!	#NULL!	#NULL!	#NULL!	#NULL!	#NULL!	#NULL!				#NULL!	#NULL!	#NULL!	#NULL!	#NULL!	#NULL!
#NULL!	#NULL!		#NULL!	#NULL!	#NULL!	#NULL!	#NULL!	#NULL!	#NULL!	#NULL!	#NULL!	#NULL!	#NULL!	#NULL!	#NULL!	#NULL!	#NULL!	#NULL!	#NULL!	#NULL!	#NULL!	#NULL!	#NULL!	#NULL!	#NULL!	#NULL!	#NULL!	#NULL!	#NULL!	#NULL!	#NULL!	#NULL!	#NULL!	#NULL!				#NULL!	#NULL!	#NULL!	#NULL!	#NULL!	#NULL!
#NULL!	#NULL!		#NULL!	#NULL!	#NULL!	#NULL!	#NULL!	#NULL!	#NULL!	#NULL!	#NULL!	#NULL!	#NULL!	#NULL!	#NULL!	#NULL!	#NULL!	#NULL!	#NULL!	#NULL!	#NULL!	#NULL!	#NULL!	#NULL!	#NULL!	#NULL!	#NULL!	#NULL!	#NULL!	#NULL!	#NULL!	#NULL!	#NULL!	#NULL!				#NULL!	#NULL!	#NULL!	#NULL!	#NULL!	#NULL!
#NULL!	#NULL!		#NULL!	#NULL!	#NULL!	#NULL!	#NULL!	#NULL!	#NULL!	#NULL!	#NULL!	#NULL!	#NULL!	#NULL!	#NULL!	#NULL!	#NULL!	#NULL!	#NULL!	#NULL!	#NULL!	#NULL!	#NULL!	#NULL!	#NULL!	#NULL!	#NULL!	#NULL!	#NULL!	#NULL!	#NULL!	#NULL!	#NULL!	#NULL!				#NULL!	#NULL!	#NULL!	#NULL!	#NULL!	#NULL!
#NULL!	#NULL!		#NULL!	#NULL!	#NULL!	#NULL!	#NULL!	#NULL!	#NULL!	#NULL!	#NULL!	#NULL!	#NULL!	#NULL!	#NULL!	#NULL!	#NULL!	#NULL!	#NULL!	#NULL!	#NULL!	#NULL!	#NULL!	#NULL!	#NULL!	#NULL!	#NULL!	#NULL!	#NULL!	#NULL!	#NULL!	#NULL!	#NULL!	#NULL!				#NULL!	#NULL!	#NULL!	#NULL!	#NULL!	#NULL!
#NULL!	#NULL!		#NULL!	#NULL!	#NULL!	#NULL!	#NULL!	#NULL!	#NULL!	#NULL!	#NULL!	#NULL!	#NULL!	#NULL!	#NULL!	#NULL!	#NULL!	#NULL!	#NULL!	#NULL!	#NULL!	#NULL!	#NULL!	#NULL!	#NULL!	#NULL!	#NULL!	#NULL!	#NULL!	#NULL!	#NULL!	#NULL!	#NULL!	#NULL!				#NULL!	#NULL!	#NULL!	#NULL!	#NULL!	#NULL!
#NULL!	#NULL!		#NULL!	#NULL!	#NULL!	#NULL!	#NULL!	#NULL!	#NULL!	#NULL!	#NULL!	#NULL!	#NULL!	#NULL!	#NULL!	#NULL!	#NULL!	#NULL!	#NULL!	#NULL!	#NULL!	#NULL!	#NULL!	#NULL!	#NULL!	#NULL!	#NULL!	#NULL!	#NULL!	#NULL!	#NULL!	#NULL!	#NULL!	#NULL!				#NULL!	#NULL!	#NULL!	#NULL!	#NULL!	#NULL!
#NULL!	#NULL!		#NULL!	#NULL!	#NULL!	#NULL!	#NULL!	#NULL!	#NULL!	#NULL!	#NULL!	#NULL!	#NULL!	#NULL!	#NULL!	#NULL!	#NULL!	#NULL!	#NULL!	#NULL!	#NULL!	#NULL!	#NULL!	#NULL!	#NULL!	#NULL!	#NULL!	#NULL!	#NULL!	#NULL!	#NULL!	#NULL!	#NULL!	#NULL!				#NULL!	#NULL!	#NULL!	#NULL!	#NULL!	#NULL!
#NULL!	#NULL!		#NULL!	#NULL!	#NULL!	#NULL!	#NULL!	#NULL!	#NULL!	#NULL!	#NULL!	#NULL!	#NULL!	#NULL!	#NULL!	#NULL!	#NULL!	#NULL!	#NULL!	#NULL!	#NULL!	#NULL!	#NULL!	#NULL!	#NULL!	#NULL!	#NULL!	#NULL!	#NULL!	#NULL!	#NULL!	#NULL!	#NULL!	#NULL!				#NULL!	#NULL!	#NULL!	#NULL!	#NULL!	#NULL!
#NULL!	#NULL!		#NULL!	#NULL!	#NULL!	#NULL!	#NULL!	#NULL!	#NULL!	#NULL!	#NULL!	#NULL!	#NULL!	#NULL!	#NULL!	#NULL!	#NULL!	#NULL!	#NULL!	#NULL!	#NULL!	#NULL!	#NULL!	#NULL!	#NULL!	#NULL!	#NULL!	#NULL!	#NULL!	#NULL!	#NULL!	#NULL!	#NULL!	#NULL!				#NULL!	#NULL!	#NULL!	#NULL!	#NULL!	#NULL!
#NULL!	#NULL!		#NULL!	#NULL!	#NULL!	#NULL!	#NULL!	#NULL!	#NULL!	#NULL!	#NULL!	#NULL!	#NULL!	#NULL!	#NULL!	#NULL!	#NULL!	#NULL!	#NULL!	#NULL!	#NULL!	#NULL!	#NULL!	#NULL!	#NULL!	#NULL!	#NULL!	#NULL!	#NULL!	#NULL!	#NULL!	#NULL!	#NULL!	#NULL!				#NULL!	#NULL!	#NULL!	#NULL!	#NULL!	#NULL!
#NULL!	#NULL!		#NULL!	#NULL!	#NULL!	#NULL!	#NULL!	#NULL!	#NULL!	#NULL!	#NULL!	#NULL!	#NULL!	#NULL!	#NULL!	#NULL!	#NULL!	#NULL!	#NULL!	#NULL!	#NULL!	#NULL!	#NULL!	#NULL!	#NULL!	#NULL!	#NULL!	#NULL!	#NULL!	#NULL!	#NULL!	#NULL!	#NULL!	#NULL!				#NULL!	#NULL!	#NULL!	#NULL!	#NULL!	#NULL!
#NULL!	#NULL!		#NULL!	#NULL!	#NULL!	#NULL!	#NULL!	#NULL!	#NULL!	#NULL!	#NULL!	#NULL!	#NULL!	#NULL!	#NULL!	#NULL!	#NULL!	#NULL!	#NULL!	#NULL!	#NULL!	#NULL!	#NULL!	#NULL!	#NULL!	#NULL!	#NULL!	#NULL!	#NULL!	#NULL!	#NULL!	#NULL!	#NULL!	#NULL!				#NULL!	#NULL!	#NULL!	#NULL!	#NULL!	#NULL!
#NULL!	#NULL!		#NULL!	#NULL!	#NULL!	#NULL!	#NULL!	#NULL!	#NULL!	#NULL!	#NULL!	#NULL!	#NULL!	#NULL!	#NULL!	#NULL!	#NULL!	#NULL!	#NULL!	#NULL!	#NULL!	#NULL!	#NULL!	#NULL!	#NULL!	#NULL!	#NULL!	#NULL!	#NULL!	#NULL!	#NULL!	#NULL!	#NULL!	#NULL!				#NULL!	#NULL!	#NULL!	#NULL!	#NULL!	#NULL!
#NULL!	#NULL!		#NULL!	#NULL!	#NULL!	#NULL!	#NULL!	#NULL!	#NULL!	#NULL!	#NULL!	#NULL!	#NULL!	#NULL!	#NULL!	#NULL!	#NULL!	#NULL!	#NULL!	#NULL!	#NULL!	#NULL!	#NULL!	#NULL!	#NULL!	#NULL!	#NULL!	#NULL!	#NULL!	#NULL!	#NULL!	#NULL!	#NULL!	#NULL!				#NULL!	#NULL!	#NULL!	#NULL!	#NULL!	#NULL!
#NULL!	#NULL!		#NULL!	#NULL!	#NULL!	#NULL!	#NULL!	#NULL!	#NULL!	#NULL!	#NULL!	#NULL!	#NULL!	#NULL!	#NULL!	#NULL!	#NULL!	#NULL!	#NULL!	#NULL!	#NULL!	#NULL!	#NULL!	#NULL!	#NULL!	#NULL!	#NULL!	#NULL!	#NULL!	#NULL!	#NULL!	#NULL!	#NULL!	#NULL!				#NULL!	#NULL!	#NULL!	#NULL!	#NULL!	#NULL!
#NULL!	#NULL!		#NULL!	#NULL!	#NULL!	#NULL!	#NULL!	#NULL!	#NULL!	#NULL!	#NULL!	#NULL!	#NULL!	#NULL!	#NULL!	#NULL!	#NULL!	#NULL!	#NULL!	#NULL!	#NULL!	#NULL!	#NULL!	#NULL!	#NULL!	#NULL!	#NULL!	#NULL!	#NULL!	#NULL!	#NULL!	#NULL!	#NULL!	#NULL!				#NULL!	#NULL!	#NULL!	#NULL!	#NULL!	#NULL!
#NULL!	#NULL!		#NULL!	#NULL!	#NULL!	#NULL!	#NULL!	#NULL!	#NULL!	#NULL!	#NULL!	#NULL!	#NULL!	#NULL!	#NULL!	#NULL!	#NULL!	#NULL!	#NULL!	#NULL!	#NULL!	#NULL!	#NULL!	#NULL!	#NULL!	#NULL!	#NULL!	#NULL!	#NULL!	#NULL!	#NULL!	#NULL!	#NULL!	#NULL!				#NULL!	#NULL!	#NULL!	#NULL!	#NULL!	#NULL!
#NULL!	#NULL!		#NULL!	#NULL!	#NULL!	#NULL!	#NULL!	#NULL!	#NULL!	#NULL!	#NULL!	#NULL!	#NULL!	#NULL!	#NULL!	#NULL!	#NULL!	#NULL!	#NULL!	#NULL!	#NULL!	#NULL!	#NULL!	#NULL!	#NULL!	#NULL!	#NULL!	#NULL!	#NULL!	#NULL!	#NULL!	#NULL!	#NULL!	#NULL!				#NULL!	#NULL!	#NULL!	#NULL!	#NULL!	#NULL!
#NULL!	#NULL!		#NULL!	#NULL!	#NULL!	#NULL!	#NULL!	#NULL!	#NULL!	#NULL!	#NULL!	#NULL!	#NULL!	#NULL!	#NULL!	#NULL!	#NULL!	#NULL!	#NULL!	#NULL!	#NULL!	#NULL!	#NULL!	#NULL!	#NULL!	#NULL!	#NULL!	#NULL!	#NULL!	#NULL!	#NULL!	#NULL!	#NULL!	#NULL!				#NULL!	#NULL!	#NULL!	#NULL!	#NULL!	#NULL!
#NULL!	#NULL!		#NULL!	#NULL!	#NULL!	#NULL!	#NULL!	#NULL!	#NULL!	#NULL!	#NULL!	#NULL!	#NULL!	#NULL!	#NULL!	#NULL!	#NULL!	#NULL!	#NULL!	#NULL!	#NULL!	#NULL!	#NULL!	#NULL!	#NULL!	#NULL!	#NULL!	#NULL!	#NULL!	#NULL!	#NULL!	#NULL!	#NULL!	#NULL!				#NULL!	#NULL!	#NULL!	#NULL!	#NULL!	#NULL!
#NULL!	#NULL!		#NULL!	#NULL!	#NULL!	#NULL!	#NULL!	#NULL!	#NULL!	#NULL!	#NULL!	#NULL!	#NULL!	#NULL!	#NULL!	#NULL!	#NULL!	#NULL!	#NULL!	#NULL!	#NULL!	#NULL!	#NULL!	#NULL!	#NULL!	#NULL!	#NULL!	#NULL!	#NULL!	#NULL!	#NULL!	#NULL!	#NULL!	#NULL!				#NULL!	#NULL!	#NULL!	#NULL!	#NULL!	#NULL!
#NULL!	#NULL!		#NULL!	#NULL!	#NULL!	#NULL!	#NULL!	#NULL!	#NULL!	#NULL!	#NULL!	#NULL!	#NULL!	#NULL!	#NULL!	#NULL!	#NULL!	#NULL!	#NULL!	#NULL!	#NULL!	#NULL!	#NULL!	#NULL!	#NULL!	#NULL!	#NULL!	#NULL!	#NULL!	#NULL!	#NULL!	#NULL!	#NULL!	#NULL!				#NULL!	#NULL!	#NULL!	#NULL!	#NULL!	#NULL!
#NULL!	#NULL!		#NULL!	#NULL!	#NULL!	#NULL!	#NULL!	#NULL!	#NULL!	#NULL!	#NULL!	#NULL!	#NULL!	#NULL!	#NULL!	#NULL!	#NULL!	#NULL!	#NULL!	#NULL!	#NULL!	#NULL!	#NULL!	#NULL!	#NULL!	#NULL!	#NULL!	#NULL!	#NULL!	#NULL!	#NULL!	#NULL!	#NULL!	#NULL!				#NULL!	#NULL!	#NULL!	#NULL!	#NULL!	#NULL!
#NULL!	#NULL!		#NULL!	#NULL!	#NULL!	#NULL!	#NULL!	#NULL!	#NULL!	#NULL!	#NULL!	#NULL!	#NULL!	#NULL!	#NULL!	#NULL!	#NULL!	#NULL!	#NULL!	#NULL!	#NULL!	#NULL!	#NULL!	#NULL!	#NULL!	#NULL!	#NULL!	#NULL!	#NULL!	#NULL!	#NULL!	#NULL!	#NULL!	#NULL!				#NULL!	#NULL!	#NULL!	#NULL!	#NULL!	#NULL!
#NULL!	#NULL!		#NULL!	#NULL!	#NULL!	#NULL!	#NULL!	#NULL!	#NULL!	#NULL!	#NULL!	#NULL!	#NULL!	#NULL!	#NULL!	#NULL!	#NULL!	#NULL!	#NULL!	#NULL!	#NULL!	#NULL!	#NULL!	#NULL!	#NULL!	#NULL!	#NULL!	#NULL!	#NULL!	#NULL!	#NULL!	#NULL!	#NULL!	#NULL!				#NULL!	#NULL!	#NULL!	#NULL!	#NULL!	#NULL!
#NULL!	#NULL!		#NULL!	#NULL!	#NULL!	#NULL!	#NULL!	#NULL!	#NULL!	#NULL!	#NULL!	#NULL!	#NULL!	#NULL!	#NULL!	#NULL!	#NULL!	#NULL!	#NULL!	#NULL!	#NULL!	#NULL!	#NULL!	#NULL!	#NULL!	#NULL!	#NULL!	#NULL!	#NULL!	#NULL!	#NULL!	#NULL!	#NULL!	#NULL!				#NULL!	#NULL!	#NULL!	#NULL!	#NULL!	#NULL!
#NULL!	#NULL!		#NULL!	#NULL!	#NULL!	#NULL!	#NULL!	#NULL!	#NULL!	#NULL!	#NULL!	#NULL!	#NULL!	#NULL!	#NULL!	#NULL!	#NULL!	#NULL!	#NULL!	#NULL!	#NULL!	#NULL!	#NULL!	#NULL!	#NULL!	#NULL!	#NULL!	#NULL!	#NULL!	#NULL!	#NULL!	#NULL!	#NULL!	#NULL!				#NULL!	#NULL!	#NULL!	#NULL!	#NULL!	#NULL!
#NULL!	#NULL!		#NULL!	#NULL!	#NULL!	#NULL!	#NULL!	#NULL!	#NULL!	#NULL!	#NULL!	#NULL!	#NULL!	#NULL!	#NULL!	#NULL!	#NULL!	#NULL!	#NULL!	#NULL!	#NULL!	#NULL!	#NULL!	#NULL!	#NULL!	#NULL!	#NULL!	#NULL!	#NULL!	#NULL!	#NULL!	#NULL!	#NULL!	#NULL!				#NULL!	#NULL!	#NULL!	#NULL!	#NULL!	#NULL!
#NULL!	#NULL!		#NULL!	#NULL!	#NULL!	#NULL!	#NULL!	#NULL!	#NULL!	#NULL!	#NULL!	#NULL!	#NULL!	#NULL!	#NULL!	#NULL!	#NULL!	#NULL!	#NULL!	#NULL!	#NULL!	#NULL!	#NULL!	#NULL!	#NULL!	#NULL!	#NULL!	#NULL!	#NULL!	#NULL!	#NULL!	#NULL!	#NULL!	#NULL!				#NULL!	#NULL!	#NULL!	#NULL!	#NULL!	#NULL!
#NULL!	#NULL!		#NULL!	#NULL!	#NULL!	#NULL!	#NULL!	#NULL!	#NULL!	#NULL!	#NULL!	#NULL!	#NULL!	#NULL!	#NULL!	#NULL!	#NULL!	#NULL!	#NULL!	#NULL!	#NULL!	#NULL!	#NULL!	#NULL!	#NULL!	#NULL!	#NULL!	#NULL!	#NULL!	#NULL!	#NULL!	#NULL!	#NULL!	#NULL!				#NULL!	#NULL!	#NULL!	#NULL!	#NULL!	#NULL!
#NULL!	#NULL!		#NULL!	#NULL!	#NULL!	#NULL!	#NULL!	#NULL!	#NULL!	#NULL!	#NULL!	#NULL!	#NULL!	#NULL!	#NULL!	#NULL!	#NULL!	#NULL!	#NULL!	#NULL!	#NULL!	#NULL!	#NULL!	#NULL!	#NULL!	#NULL!	#NULL!	#NULL!	#NULL!	#NULL!	#NULL!	#NULL!	#NULL!	#NULL!				#NULL!	#NULL!	#NULL!	#NULL!	#NULL!	#NULL!
#NULL!	#NULL!		#NULL!	#NULL!	#NULL!	#NULL!	#NULL!	#NULL!	#NULL!	#NULL!	#NULL!	#NULL!	#NULL!	#NULL!	#NULL!	#NULL!	#NULL!	#NULL!	#NULL!	#NULL!	#NULL!	#NULL!	#NULL!	#NULL!	#NULL!	#NULL!	#NULL!	#NULL!	#NULL!	#NULL!	#NULL!	#NULL!	#NULL!	#NULL!				#NULL!	#NULL!	#NULL!	#NULL!	#NULL!	#NULL!
#NULL!	#NULL!		#NULL!	#NULL!	#NULL!	#NULL!	#NULL!	#NULL!	#NULL!	#NULL!	#NULL!	#NULL!	#NULL!	#NULL!	#NULL!	#NULL!	#NULL!	#NULL!	#NULL!	#NULL!	#NULL!	#NULL!	#NULL!	#NULL!	#NULL!	#NULL!	#NULL!	#NULL!	#NULL!	#NULL!	#NULL!	#NULL!	#NULL!	#NULL!				#NULL!	#NULL!	#NULL!	#NULL!	#NULL!	#NULL!
#NULL!	#NULL!		#NULL!	#NULL!	#NULL!	#NULL!	#NULL!	#NULL!	#NULL!	#NULL!	#NULL!	#NULL!	#NULL!	#NULL!	#NULL!	#NULL!	#NULL!	#NULL!	#NULL!	#NULL!	#NULL!	#NULL!	#NULL!	#NULL!	#NULL!	#NULL!	#NULL!	#NULL!	#NULL!	#NULL!	#NULL!	#NULL!	#NULL!	#NULL!				#NULL!	#NULL!	#NULL!	#NULL!	#NULL!	#NULL!
#NULL!	#NULL!		#NULL!	#NULL!	#NULL!	#NULL!	#NULL!	#NULL!	#NULL!	#NULL!	#NULL!	#NULL!	#NULL!	#NULL!	#NULL!	#NULL!	#NULL!	#NULL!	#NULL!	#NULL!	#NULL!	#NULL!	#NULL!	#NULL!	#NULL!	#NULL!	#NULL!	#NULL!	#NULL!	#NULL!	#NULL!	#NULL!	#NULL!	#NULL!				#NULL!	#NULL!	#NULL!	#NULL!	#NULL!	#NULL!
#NULL!	#NULL!		#NULL!	#NULL!	#NULL!	#NULL!	#NULL!	#NULL!	#NULL!	#NULL!	#NULL!	#NULL!	#NULL!	#NULL!	#NULL!	#NULL!	#NULL!	#NULL!	#NULL!	#NULL!	#NULL!	#NULL!	#NULL!	#NULL!	#NULL!	#NULL!	#NULL!	#NULL!	#NULL!	#NULL!	#NULL!	#NULL!	#NULL!	#NULL!				#NULL!	#NULL!	#NULL!	#NULL!	#NULL!	#NULL!
#NULL!	#NULL!		#NULL!	#NULL!	#NULL!	#NULL!	#NULL!	#NULL!	#NULL!	#NULL!	#NULL!	#NULL!	#NULL!	#NULL!	#NULL!	#NULL!	#NULL!	#NULL!	#NULL!	#NULL!	#NULL!	#NULL!	#NULL!	#NULL!	#NULL!	#NULL!	#NULL!	#NULL!	#NULL!	#NULL!	#NULL!	#NULL!	#NULL!	#NULL!				#NULL!	#NULL!	#NULL!	#NULL!	#NULL!	#NULL!
#NULL!	#NULL!		#NULL!	#NULL!	#NULL!	#NULL!	#NULL!	#NULL!	#NULL!	#NULL!	#NULL!	#NULL!	#NULL!	#NULL!	#NULL!	#NULL!	#NULL!	#NULL!	#NULL!	#NULL!	#NULL!	#NULL!	#NULL!	#NULL!	#NULL!	#NULL!	#NULL!	#NULL!	#NULL!	#NULL!	#NULL!	#NULL!	#NULL!	#NULL!				#NULL!	#NULL!	#NULL!	#NULL!	#NULL!	#NULL!
#NULL!	#NULL!		#NULL!	#NULL!	#NULL!	#NULL!	#NULL!	#NULL!	#NULL!	#NULL!	#NULL!	#NULL!	#NULL!	#NULL!	#NULL!	#NULL!	#NULL!	#NULL!	#NULL!	#NULL!	#NULL!	#NULL!	#NULL!	#NULL!	#NULL!	#NULL!	#NULL!	#NULL!	#NULL!	#NULL!	#NULL!	#NULL!	#NULL!	#NULL!				#NULL!	#NULL!	#NULL!	#NULL!	#NULL!	#NULL!
#NULL!	#NULL!		#NULL!	#NULL!	#NULL!	#NULL!	#NULL!	#NULL!	#NULL!	#NULL!	#NULL!	#NULL!	#NULL!	#NULL!	#NULL!	#NULL!	#NULL!	#NULL!	#NULL!	#NULL!	#NULL!	#NULL!	#NULL!	#NULL!	#NULL!	#NULL!	#NULL!	#NULL!	#NULL!	#NULL!	#NULL!	#NULL!	#NULL!	#NULL!				#NULL!	#NULL!	#NULL!	#NULL!	#NULL!	#NULL!
#NULL!	#NULL!		#NULL!	#NULL!	#NULL!	#NULL!	#NULL!	#NULL!	#NULL!	#NULL!	#NULL!	#NULL!	#NULL!	#NULL!	#NULL!	#NULL!	#NULL!	#NULL!	#NULL!	#NULL!	#NULL!	#NULL!	#NULL!	#NULL!	#NULL!	#NULL!	#NULL!	#NULL!	#NULL!	#NULL!	#NULL!	#NULL!	#NULL!	#NULL!				#NULL!	#NULL!	#NULL!	#NULL!	#NULL!	#NULL!
#NULL!	#NULL!		#NULL!	#NULL!	#NULL!	#NULL!	#NULL!	#NULL!	#NULL!	#NULL!	#NULL!	#NULL!	#NULL!	#NULL!	#NULL!	#NULL!	#NULL!	#NULL!	#NULL!	#NULL!	#NULL!	#NULL!	#NULL!	#NULL!	#NULL!	#NULL!	#NULL!	#NULL!	#NULL!	#NULL!	#NULL!	#NULL!	#NULL!	#NULL!				#NULL!	#NULL!	#NULL!	#NULL!	#NULL!	#NULL!
#NULL!	#NULL!		#NULL!	#NULL!	#NULL!	#NULL!	#NULL!	#NULL!	#NULL!	#NULL!	#NULL!	#NULL!	#NULL!	#NULL!	#NULL!	#NULL!	#NULL!	#NULL!	#NULL!	#NULL!	#NULL!	#NULL!	#NULL!	#NULL!	#NULL!	#NULL!	#NULL!	#NULL!	#NULL!	#NULL!	#NULL!	#NULL!	#NULL!	#NULL!				#NULL!	#NULL!	#NULL!	#NULL!	#NULL!	#NULL!
#NULL!	#NULL!		#NULL!	#NULL!	#NULL!	#NULL!	#NULL!	#NULL!	#NULL!	#NULL!	#NULL!	#NULL!	#NULL!	#NULL!	#NULL!	#NULL!	#NULL!	#NULL!	#NULL!	#NULL!	#NULL!	#NULL!	#NULL!	#NULL!	#NULL!	#NULL!	#NULL!	#NULL!	#NULL!	#NULL!	#NULL!	#NULL!	#NULL!	#NULL!				#NULL!	#NULL!	#NULL!	#NULL!	#NULL!	#NULL!
#NULL!	#NULL!		#NULL!	#NULL!	#NULL!	#NULL!	#NULL!	#NULL!	#NULL!	#NULL!	#NULL!	#NULL!	#NULL!	#NULL!	#NULL!	#NULL!	#NULL!	#NULL!	#NULL!	#NULL!	#NULL!	#NULL!	#NULL!	#NULL!	#NULL!	#NULL!	#NULL!	#NULL!	#NULL!	#NULL!	#NULL!	#NULL!	#NULL!	#NULL!				#NULL!	#NULL!	#NULL!	#NULL!	#NULL!	#NULL!
#NULL!	#NULL!		#NULL!	#NULL!	#NULL!	#NULL!	#NULL!	#NULL!	#NULL!	#NULL!	#NULL!	#NULL!	#NULL!	#NULL!	#NULL!	#NULL!	#NULL!	#NULL!	#NULL!	#NULL!	#NULL!	#NULL!	#NULL!	#NULL!	#NULL!	#NULL!	#NULL!	#NULL!	#NULL!	#NULL!	#NULL!	#NULL!	#NULL!	#NULL!				#NULL!	#NULL!	#NULL!	#NULL!	#NULL!	#NULL!
#NULL!	#NULL!		#NULL!	#NULL!	#NULL!	#NULL!	#NULL!	#NULL!	#NULL!	#NULL!	#NULL!	#NULL!	#NULL!	#NULL!	#NULL!	#NULL!	#NULL!	#NULL!	#NULL!	#NULL!	#NULL!	#NULL!	#NULL!	#NULL!	#NULL!	#NULL!	#NULL!	#NULL!	#NULL!	#NULL!	#NULL!	#NULL!	#NULL!	#NULL!				#NULL!	#NULL!	#NULL!	#NULL!	#NULL!	#NULL!
#NULL!	#NULL!		#NULL!	#NULL!	#NULL!	#NULL!	#NULL!	#NULL!	#NULL!	#NULL!	#NULL!	#NULL!	#NULL!	#NULL!	#NULL!	#NULL!	#NULL!	#NULL!	#NULL!	#NULL!	#NULL!	#NULL!	#NULL!	#NULL!	#NULL!	#NULL!	#NULL!	#NULL!	#NULL!	#NULL!	#NULL!	#NULL!	#NULL!	#NULL!				#NULL!	#NULL!	#NULL!	#NULL!	#NULL!	#NULL!
#NULL!	#NULL!		#NULL!	#NULL!	#NULL!	#NULL!	#NULL!	#NULL!	#NULL!	#NULL!	#NULL!	#NULL!	#NULL!	#NULL!	#NULL!	#NULL!	#NULL!	#NULL!	#NULL!	#NULL!	#NULL!	#NULL!	#NULL!	#NULL!	#NULL!	#NULL!	#NULL!	#NULL!	#NULL!	#NULL!	#NULL!	#NULL!	#NULL!	#NULL!				#NULL!	#NULL!	#NULL!	#NULL!	#NULL!	#NULL!
#NULL!	#NULL!		#NULL!	#NULL!	#NULL!	#NULL!	#NULL!	#NULL!	#NULL!	#NULL!	#NULL!	#NULL!	#NULL!	#NULL!	#NULL!	#NULL!	#NULL!	#NULL!	#NULL!	#NULL!	#NULL!	#NULL!	#NULL!	#NULL!	#NULL!	#NULL!	#NULL!	#NULL!	#NULL!	#NULL!	#NULL!	#NULL!	#NULL!	#NULL!				#NULL!	#NULL!	#NULL!	#NULL!	#NULL!	#NULL!
#NULL!	#NULL!		#NULL!	#NULL!	#NULL!	#NULL!	#NULL!	#NULL!	#NULL!	#NULL!	#NULL!	#NULL!	#NULL!	#NULL!	#NULL!	#NULL!	#NULL!	#NULL!	#NULL!	#NULL!	#NULL!	#NULL!	#NULL!	#NULL!	#NULL!	#NULL!	#NULL!	#NULL!	#NULL!	#NULL!	#NULL!	#NULL!	#NULL!	#NULL!				#NULL!	#NULL!	#NULL!	#NULL!	#NULL!	#NULL!
#NULL!	#NULL!		#NULL!	#NULL!	#NULL!	#NULL!	#NULL!	#NULL!	#NULL!	#NULL!	#NULL!	#NULL!	#NULL!	#NULL!	#NULL!	#NULL!	#NULL!	#NULL!	#NULL!	#NULL!	#NULL!	#NULL!	#NULL!	#NULL!	#NULL!	#NULL!	#NULL!	#NULL!	#NULL!	#NULL!	#NULL!	#NULL!	#NULL!	#NULL!				#NULL!	#NULL!	#NULL!	#NULL!	#NULL!	#NULL!
#NULL!	#NULL!		#NULL!	#NULL!	#NULL!	#NULL!	#NULL!	#NULL!	#NULL!	#NULL!	#NULL!	#NULL!	#NULL!	#NULL!	#NULL!	#NULL!	#NULL!	#NULL!	#NULL!	#NULL!	#NULL!	#NULL!	#NULL!	#NULL!	#NULL!	#NULL!	#NULL!	#NULL!	#NULL!	#NULL!	#NULL!	#NULL!	#NULL!	#NULL!				#NULL!	#NULL!	#NULL!	#NULL!	#NULL!	#NULL!
#NULL!	#NULL!		#NULL!	#NULL!	#NULL!	#NULL!	#NULL!	#NULL!	#NULL!	#NULL!	#NULL!	#NULL!	#NULL!	#NULL!	#NULL!	#NULL!	#NULL!	#NULL!	#NULL!	#NULL!	#NULL!	#NULL!	#NULL!	#NULL!	#NULL!	#NULL!	#NULL!	#NULL!	#NULL!	#NULL!	#NULL!	#NULL!	#NULL!	#NULL!				#NULL!	#NULL!	#NULL!	#NULL!	#NULL!	#NULL!
#NULL!	#NULL!		#NULL!	#NULL!	#NULL!	#NULL!	#NULL!	#NULL!	#NULL!	#NULL!	#NULL!	#NULL!	#NULL!	#NULL!	#NULL!	#NULL!	#NULL!	#NULL!	#NULL!	#NULL!	#NULL!	#NULL!	#NULL!	#NULL!	#NULL!	#NULL!	#NULL!	#NULL!	#NULL!	#NULL!	#NULL!	#NULL!	#NULL!	#NULL!				#NULL!	#NULL!	#NULL!	#NULL!	#NULL!	#NULL!
#NULL!	#NULL!		#NULL!	#NULL!	#NULL!	#NULL!	#NULL!	#NULL!	#NULL!	#NULL!	#NULL!	#NULL!	#NULL!	#NULL!	#NULL!	#NULL!	#NULL!	#NULL!	#NULL!	#NULL!	#NULL!	#NULL!	#NULL!	#NULL!	#NULL!	#NULL!	#NULL!	#NULL!	#NULL!	#NULL!	#NULL!	#NULL!	#NULL!	#NULL!				#NULL!	#NULL!	#NULL!	#NULL!	#NULL!	#NULL!
#NULL!	#NULL!		#NULL!	#NULL!	#NULL!	#NULL!	#NULL!	#NULL!	#NULL!	#NULL!	#NULL!	#NULL!	#NULL!	#NULL!	#NULL!	#NULL!	#NULL!	#NULL!	#NULL!	#NULL!	#NULL!	#NULL!	#NULL!	#NULL!	#NULL!	#NULL!	#NULL!	#NULL!	#NULL!	#NULL!	#NULL!	#NULL!	#NULL!	#NULL!				#NULL!	#NULL!	#NULL!	#NULL!	#NULL!	#NULL!
#NULL!	#NULL!		#NULL!	#NULL!	#NULL!	#NULL!	#NULL!	#NULL!	#NULL!	#NULL!	#NULL!	#NULL!	#NULL!	#NULL!	#NULL!	#NULL!	#NULL!	#NULL!	#NULL!	#NULL!	#NULL!	#NULL!	#NULL!	#NULL!	#NULL!	#NULL!	#NULL!	#NULL!	#NULL!	#NULL!	#NULL!	#NULL!	#NULL!	#NULL!				#NULL!	#NULL!	#NULL!	#NULL!	#NULL!	#NULL!
#NULL!	#NULL!		#NULL!	#NULL!	#NULL!	#NULL!	#NULL!	#NULL!	#NULL!	#NULL!	#NULL!	#NULL!	#NULL!	#NULL!	#NULL!	#NULL!	#NULL!	#NULL!	#NULL!	#NULL!	#NULL!	#NULL!	#NULL!	#NULL!	#NULL!	#NULL!	#NULL!	#NULL!	#NULL!	#NULL!	#NULL!	#NULL!	#NULL!	#NULL!				#NULL!	#NULL!	#NULL!	#NULL!	#NULL!	#NULL!
#NULL!	#NULL!		#NULL!	#NULL!	#NULL!	#NULL!	#NULL!	#NULL!	#NULL!	#NULL!	#NULL!	#NULL!	#NULL!	#NULL!	#NULL!	#NULL!	#NULL!	#NULL!	#NULL!	#NULL!	#NULL!	#NULL!	#NULL!	#NULL!	#NULL!	#NULL!	#NULL!	#NULL!	#NULL!	#NULL!	#NULL!	#NULL!	#NULL!	#NULL!				#NULL!	#NULL!	#NULL!	#NULL!	#NULL!	#NULL!
#NULL!	#NULL!		#NULL!	#NULL!	#NULL!	#NULL!	#NULL!	#NULL!	#NULL!	#NULL!	#NULL!	#NULL!	#NULL!	#NULL!	#NULL!	#NULL!	#NULL!	#NULL!	#NULL!	#NULL!	#NULL!	#NULL!	#NULL!	#NULL!	#NULL!	#NULL!	#NULL!	#NULL!	#NULL!	#NULL!	#NULL!	#NULL!	#NULL!	#NULL!				#NULL!	#NULL!	#NULL!	#NULL!	#NULL!	#NULL!
#NULL!	#NULL!		#NULL!	#NULL!	#NULL!	#NULL!	#NULL!	#NULL!	#NULL!	#NULL!	#NULL!	#NULL!	#NULL!	#NULL!	#NULL!	#NULL!	#NULL!	#NULL!	#NULL!	#NULL!	#NULL!	#NULL!	#NULL!	#NULL!	#NULL!	#NULL!	#NULL!	#NULL!	#NULL!	#NULL!	#NULL!	#NULL!	#NULL!	#NULL!				#NULL!	#NULL!	#NULL!	#NULL!	#NULL!	#NULL!
#NULL!	#NULL!		#NULL!	#NULL!	#NULL!	#NULL!	#NULL!	#NULL!	#NULL!	#NULL!	#NULL!	#NULL!	#NULL!	#NULL!	#NULL!	#NULL!	#NULL!	#NULL!	#NULL!	#NULL!	#NULL!	#NULL!	#NULL!	#NULL!	#NULL!	#NULL!	#NULL!	#NULL!	#NULL!	#NULL!	#NULL!	#NULL!	#NULL!	#NULL!				#NULL!	#NULL!	#NULL!	#NULL!	#NULL!	#NULL!
#NULL!	#NULL!		#NULL!	#NULL!	#NULL!	#NULL!	#NULL!	#NULL!	#NULL!	#NULL!	#NULL!	#NULL!	#NULL!	#NULL!	#NULL!	#NULL!	#NULL!	#NULL!	#NULL!	#NULL!	#NULL!	#NULL!	#NULL!	#NULL!	#NULL!	#NULL!	#NULL!	#NULL!	#NULL!	#NULL!	#NULL!	#NULL!	#NULL!	#NULL!				#NULL!	#NULL!	#NULL!	#NULL!	#NULL!	#NULL!
